# Supplementary material
Source: PubMed Central journal article supplement (PMC2323290)

Figure S1

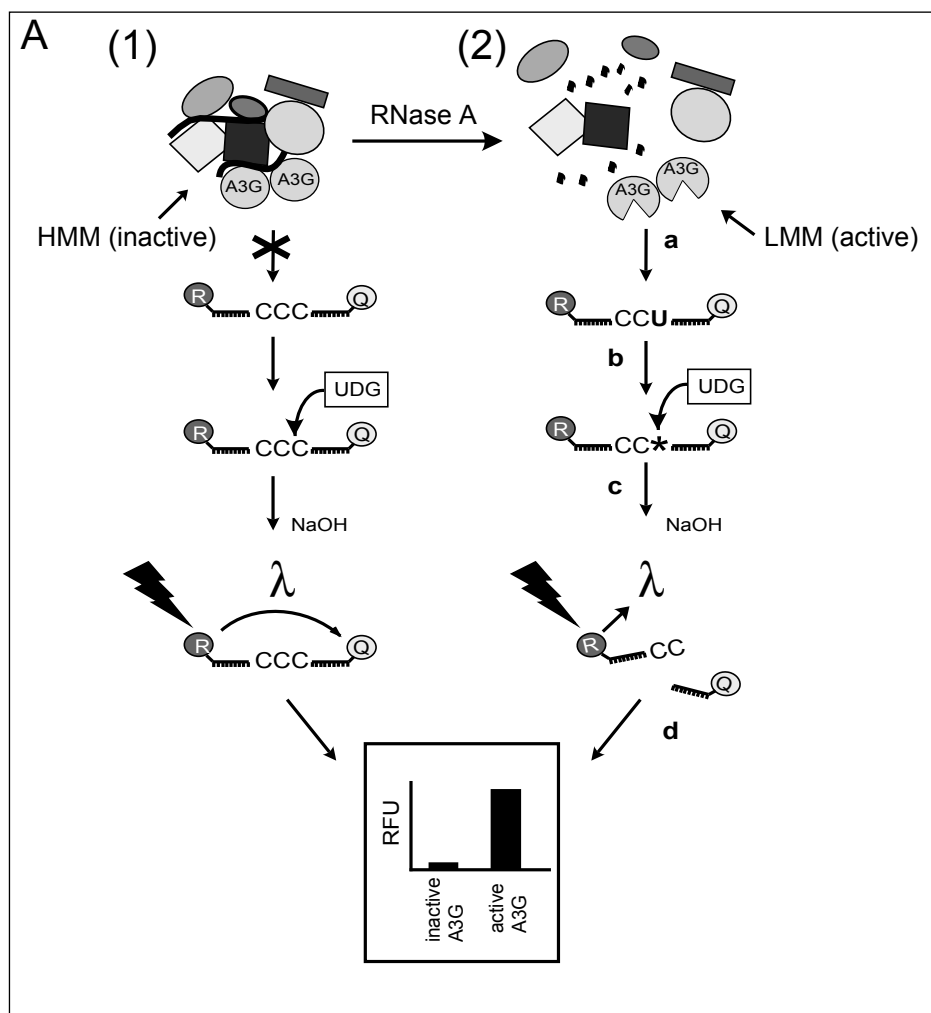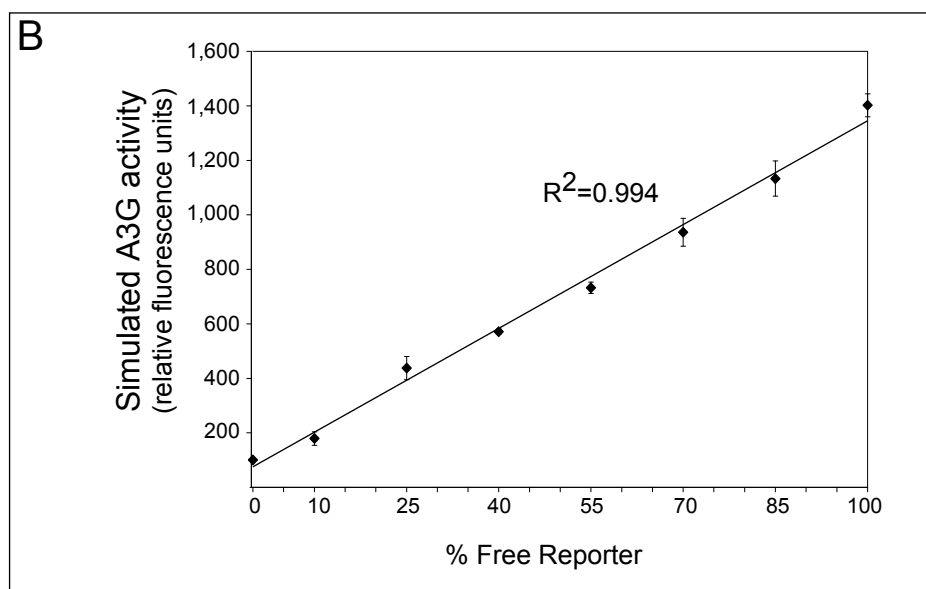

Supplement: ppat.0030135.sg001.pdf [file ppat.0030135.sg001.pdf]

Figure S2

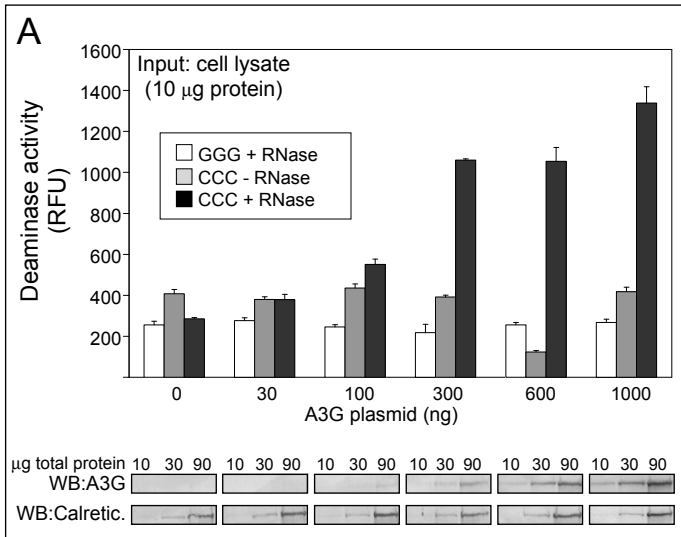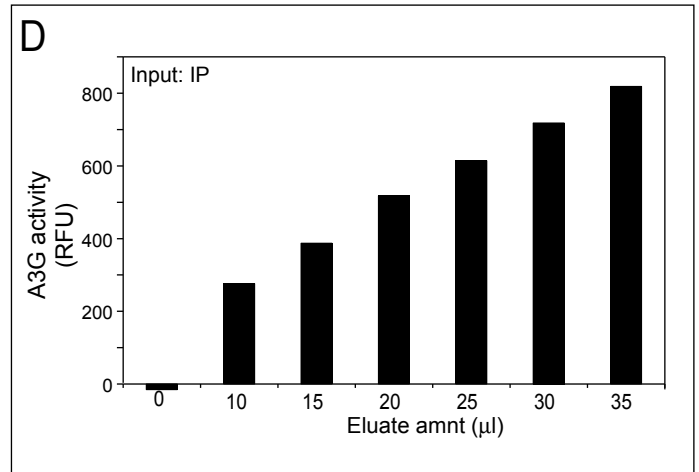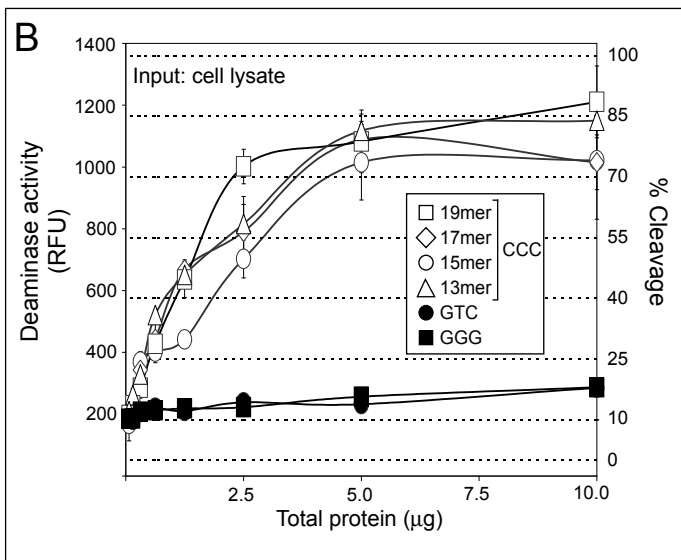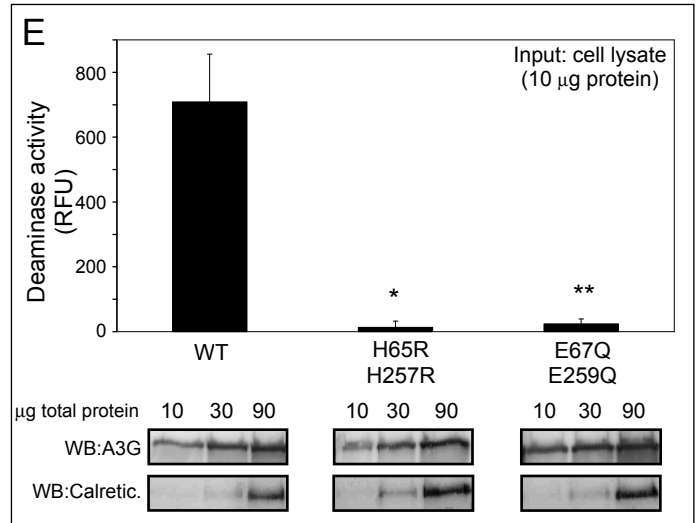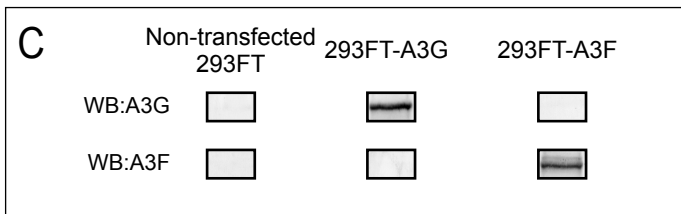

Supplement: ppat.0030135.sg002.pdf [file ppat.0030135.sg002.pdf]

Figure S3

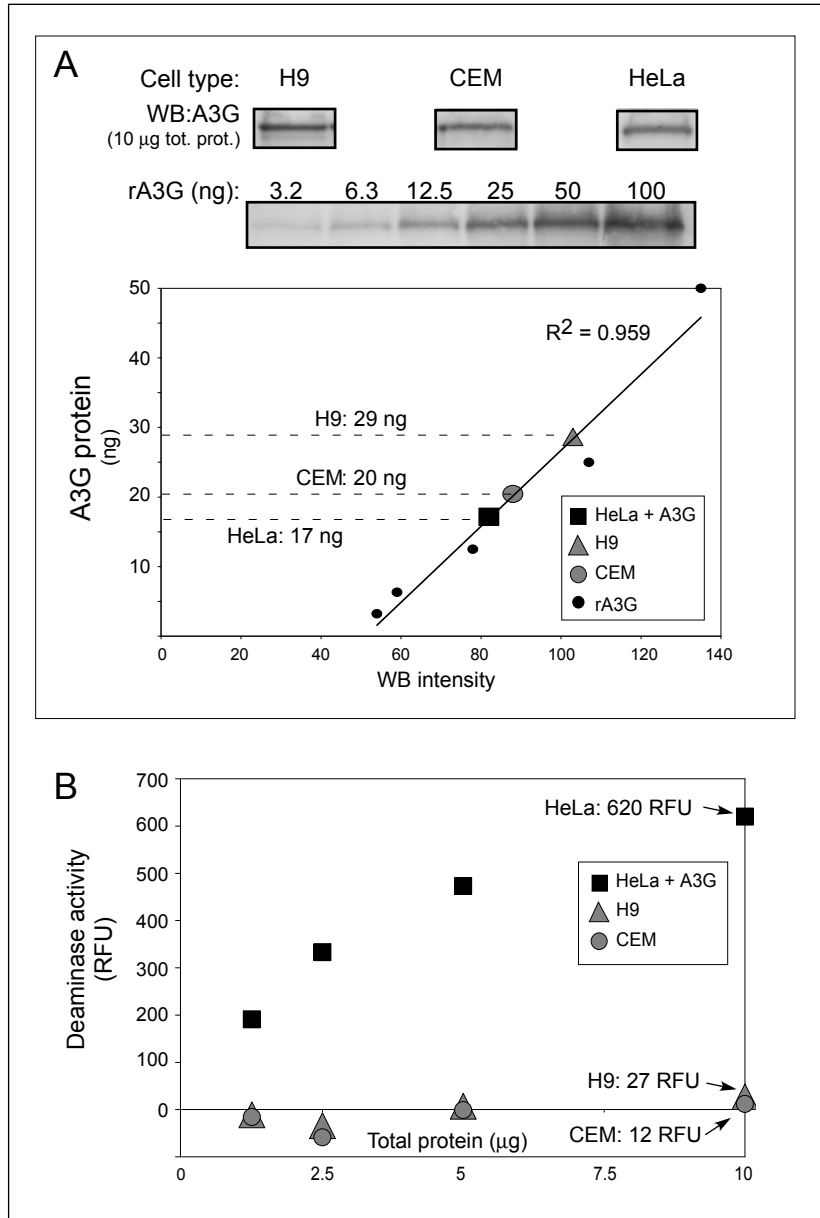

Supplement: ppat.0030135.sg003.pdf [file ppat.0030135.sg003.pdf]
